# Supplementary material for: Present and future aerosol impacts on Arctic climate change in the GISS-E2.1 Earth system model
Source: Copernicus journal article supplement (doi:10.5194/acp-2020-1296), 2021-01-07
Supplement: Supplementary file 1 [file acp-2020-1296-supplement.pdf]

## Supplementary Material

Historical and future Arctic aerosol burdens and impacts on radiative forcing and climate change as simulated by the GISS-E2.1 earth system model

Ulas Im<sup>1,2,\*</sup>, Kostas Tsigaridis<sup>3,4</sup>, Gregory Faluvegi<sup>3,4</sup>, Peter L. Langen<sup>1,2</sup>, Joshua P. French<sup>5</sup>, Rashed Mahmood<sup>6</sup>, Thomas Manu<sup>7</sup>, Knut von Salzen<sup>8</sup>, Daniel C. Thomas<sup>1,2</sup>, Cynthia H. Whaley<sup>8</sup>, Zbigniew Klimont<sup>9</sup>, Henrik Skov<sup>1,2</sup>, Jørgen Brandt<sup>1,2</sup>

<sup>1</sup>Department of Environmental Science, Aarhus University, Roskilde, Denmark.

<sup>2</sup>Interdisciplinary Centre for Climate Change, Aarhus University, Roskilde, Denmark.

<sup>3</sup>Center for Climate Systems Research, Columbia University, New York, NY, USA.

<sup>4</sup>NASA Goddard Institute for Space Studies, New York, NY, USA.

<sup>5</sup>Barcelona Supercomputing Center, Barcelona, Spain.

<sup>6</sup>Swedish Meteorological and Hydrological Institute, Norrköping, Sweden.

<sup>7</sup>Canadian Centre for Climate Modelling and Analysis, Environment and Climate Change Canada, Victoria, British Columbia, Canada.

<sup>8</sup>International Institute for Applied Systems Analysis (IIASA), Laxenburg, Austria.

### Measurement Techniques

#### *Black carbon*

Measurements of elemental carbon (EC, which is a “type” of BC) uses a thermal/ or thermal-optical method (Chow et al, 1993) after collecting particulate matter on a Quartz filter for the EMEP, IMPROVE (including Fairbanks), and CABM datasets (Torseth et al, 2012; EMEP manual, 2014; Huang et al, 2006; Sharma et al, 2017; Huang et al, 2020). This method determines the total carbon in the particulate material and then splits this measurement into OC and EC based on an optical correction via thermal-optical protocol or only using stepwise temperature to separate OC from EC (Huang et al., 2020). These are reported for PM<sub>2.5</sub> and PM<sub>10</sub> in the EMEP dataset, and for total suspended particles (TSP) in the Alert (CABM) dataset for the years 2005-2011. From 2011 to present, the Alert measurements of EC are for PM<sub>1</sub>. Alert sampling frequency is a weekly integration. The overall uncertainty for Alert EC measurements is approximately upto 30%, and the IMPROVE EC measurements have 0.002  $\mu\text{g C m}^{-3}$  method detection limit.

Measurements of equivalent black carbon (eBC, which is another “type” of BC) can be done via aethalometer (e.g. complementary measurements at Alert and at Zeppelin), or via particle soot absorption photometer (PSAP, Bond et al, 1999) at Gruvebadet, Zeppelin, and at Utqiagvik (Barrow), and these are for PM<sub>1</sub>. Both use the light absorption method where the change in light

transmission through the filter over time is related to the concentration of eBC. These eBC measurements from different instruments may be systematically offset unless scaled by a third type of measurement (e.g., Continuous Soot Monitoring System, COSMOS; Kondo et al, 2011). While each of these BC measurement methods are different, and none of them fully represent BC, they have been shown to provide a range of the “true” BC concentrations, and typically agree with each other within a factor of two (2021 AMAP SLCF report, chapter 4).

### *Sulfate*

For the IMPROVE and CABM networks, water soluble inorganic ions, like  $\text{SO}_4^{2-}$ , are measured with ion chromatography. The particulates are caught on nylon filters, then the samples are dissolved in deionized water, separated by ion chromatography and detected by changes in conductivity (Harris, 2003). For EMEP  $\text{SO}_4^{2-}$  measurements are made daily, particulate matter is collected for 24 hours on Teflon filters kept at ambient conditions. The samples are prepared via water extraction after ultrasonic treatment. The reported concentrations are blank corrected, and the method has a detection limit of 0.01-0.02  $\mu\text{g S m}^{-3}$ . At Gruvebadet lab,  $\text{SO}_4^{2-}$  is by TECORA SKYPOST sampler, with a  $\text{PM}_{10}$  particle size cutoff. FTFE filters. These  $\text{SO}_4^{2-}$  measurements have up to 20% analytical uncertainty (2021 AMAP SLCF report, chapter 4).

### *Organic carbon*

As mentioned above, OC is also measured via a thermal/or thermal- optical method (Chow et al, 1993; Huang et al., 2006; Huang e al., 2020) after being collected on a quartz filter, using the same thermal/ or thermal-optical instrumentation as EC in the IMPROVE, NAPS, EMEP and CABM measurement networks. These OC measurements have approximately 20% uncertainty (Sharma et al, 2017).

Table S1. Arctic monitoring stations and the observed aerosol species used in model evaluation

| Stations                | Latitude | Longitude | Aerosol Species                       |
|-------------------------|----------|-----------|---------------------------------------|
| Alert                   | 82.47    | -62.5     | BC, OC, SO <sub>4</sub> <sup>2-</sup> |
| Denali                  | 63.11    | -151.19   | BC, OC, SO <sub>4</sub> <sup>2-</sup> |
| Fairbanks               | 64.84    | -147.72   | BC, SO <sub>4</sub> <sup>2-</sup>     |
| Gates of the Arctic     | 67.91    | -153.46   | BC, OC, SO <sub>4</sub> <sup>2-</sup> |
| Gruvebadet              | 79.00    | 12.00     | BC                                    |
| Hurdal                  | 60.44    | 11.07     | BC, OC, SO <sub>4</sub> <sup>2-</sup> |
| Karasjok                | 69.47    | 25.51     | SO <sub>4</sub> <sup>2-</sup>         |
| Karvatn                 | 62.78    | 8.88      | BC, OC, SO <sub>4</sub> <sup>2-</sup> |
| TrapperCreek            | 62.32    | -150.23   | BC, OC, SO <sub>4</sub> <sup>2-</sup> |
| Utqiagvik               | 71.29    | -156.79   | BC, SO <sub>4</sub> <sup>2-</sup>     |
| Villum Research Station | 81.60    | -16.67    | EC, SO <sub>4</sub> <sup>2-</sup>     |
| ZeppelinMountain        | 78.91    | 11.89     | BC, SO <sub>4</sub> <sup>2-</sup>     |

Table S2. Arctic Aeronet stations used in model evaluation

| Stations           | Latitude | Longitude |
|--------------------|----------|-----------|
| Andenes            | 69.28    | 16.01     |
| Barrow             | 71.31    | 203.34    |
| Bonanza Creek      | 64.74    | 211.68    |
| Helsinki           | 60.20    | 24.96     |
| Hornsund           | 77.00    | 15.54     |
| Hyytiala           | 61.85    | 24.30     |
| Iqaluit            | 63.75    | 291.46    |
| Kangerlussuaq      | 67.00    | 309.38    |
| Kuopio             | 62.89    | 27.63     |
| Opal               | 79.99    | 274.06    |
| Pearl              | 80.05    | 273.58    |
| Resolute_Bay       | 74.71    | 265.03    |
| Thule              | 76.52    | 291.23    |
| Yakutsk            | 61.66    | 129.37    |
| Yellowknife_Aurora | 62.45    | 245.62    |
| ARM_Oliktok_AK     | 70.50    | 210.12    |
| Ittoqqortoormiit   | 70.48    | 338.05    |
| Narsarsuaq         | 61.16    | 314.58    |
| Sodankyla          | 67.37    | 26.63     |
| Tiksi              | 71.59    | 128.92    |

Table S3. Model evaluation over the individual monitoring stations for black carbon (BC). Statistics used are mean bias (*MB*), mean gross error (*MGE*), normalized mean bias (*NMB*), normalized mean gross error (*NMGE*), root mean square error (*RMSE*), and Pearson's correlation (*r*).

| Station          | <i>MB</i> | <i>MGE</i> | <i>NMB</i> | <i>NMGE</i> | <i>RMSE</i> | <i>r</i> | Simulation        |
|------------------|-----------|------------|------------|-------------|-------------|----------|-------------------|
| Alert            | -0.04     | 0.04       | -0.95      | 0.96        | 0.05        | 0.01     | Eclipse_AMIP      |
| Alert            | -0.04     | 0.04       | -0.96      | 0.96        | 0.05        | 0.43     | Eclipse_AMIP_NCEP |
| Alert            | -0.04     | 0.04       | -0.95      | 0.95        | 0.05        | 0.13     | Eclipse_CplHist1  |
| Alert            | -0.04     | 0.04       | -0.95      | 0.95        | 0.05        | 0.37     | Eclipse_CplHist2  |
| Alert            | -0.04     | 0.04       | -0.95      | 0.95        | 0.05        | 0.30     | Eclipse_CplHist3  |
| Alert            | -0.04     | 0.04       | -0.94      | 0.94        | 0.05        | 0.09     | CMIP6_Cpl_Hist    |
| Denali           | -0.06     | 0.06       | -0.73      | 0.74        | 0.11        | 0.70     | Eclipse_AMIP      |
| Denali           | -0.05     | 0.05       | -0.62      | 0.66        | 0.09        | 0.77     | Eclipse_AMIP_NCEP |
| Denali           | -0.05     | 0.06       | -0.70      | 0.72        | 0.11        | 0.60     | Eclipse_CplHist1  |
| Denali           | -0.05     | 0.05       | -0.68      | 0.70        | 0.11        | 0.60     | Eclipse_CplHist2  |
| Denali           | -0.05     | 0.05       | -0.68      | 0.70        | 0.10        | 0.71     | Eclipse_CplHist3  |
| Denali           | -0.05     | 0.05       | -0.65      | 0.69        | 0.10        | 0.65     | CMIP6_Cpl_Hist    |
| Fairbanks        | -0.02     | 0.14       | -0.19      | 1.28        | 0.33        | -0.09    | Eclipse_AMIP      |
| Fairbanks        | 0.03      | 0.16       | 0.31       | 1.50        | 0.49        | -0.08    | Eclipse_AMIP_NCEP |
| Fairbanks        | 0.00      | 0.16       | 0.04       | 1.50        | 0.46        | -0.09    | Eclipse_CplHist1  |
| Fairbanks        | -0.02     | 0.14       | -0.16      | 1.31        | 0.32        | -0.10    | Eclipse_CplHist2  |
| Fairbanks        | -0.01     | 0.15       | -0.06      | 1.39        | 0.39        | -0.09    | Eclipse_CplHist3  |
| Fairbanks        | 0.00      | 0.16       | -0.04      | 1.44        | 0.40        | -0.10    | CMIP6_Cpl_Hist    |
| GatesoftheArctic | -0.05     | 0.05       | -0.74      | 0.77        | 0.13        | 0.84     | Eclipse_AMIP      |

|                  |       |      |       |      |      |       |                   |
|------------------|-------|------|-------|------|------|-------|-------------------|
| GatesoftheArctic | -0.05 | 0.05 | -0.68 | 0.69 | 0.12 | 0.74  | Eclipse_AMIP_NCEP |
| GatesoftheArctic | -0.04 | 0.04 | -0.66 | 0.66 | 0.12 | 0.80  | Eclipse_CplHist1  |
| GatesoftheArctic | -0.04 | 0.04 | -0.64 | 0.65 | 0.11 | 0.84  | Eclipse_CplHist2  |
| GatesoftheArctic | -0.04 | 0.04 | -0.64 | 0.66 | 0.12 | 0.76  | Eclipse_CplHist3  |
| GatesoftheArctic | -0.04 | 0.04 | -0.59 | 0.61 | 0.14 | 0.53  | CMIP6_Cpl_Hist    |
| Gruvebadet       | -0.04 | 0.04 | -0.93 | 0.93 | 0.06 | 0.43  | Eclipse_AMIP      |
| Gruvebadet       | -0.05 | 0.05 | -0.94 | 0.94 | 0.06 | 0.42  | Eclipse_AMIP_NCEP |
| Gruvebadet       | -0.04 | 0.04 | -0.93 | 0.93 | 0.06 | 0.34  | Eclipse_CplHist1  |
| Gruvebadet       | -0.04 | 0.04 | -0.91 | 0.91 | 0.05 | 0.23  | Eclipse_CplHist2  |
| Gruvebadet       | -0.05 | 0.05 | -0.94 | 0.94 | 0.06 | 0.43  | Eclipse_CplHist3  |
| Gruvebadet       | -0.04 | 0.04 | -0.87 | 0.87 | 0.05 | 0.25  | CMIP6_Cpl_Hist    |
| Hurdal           | -0.06 | 0.06 | -0.43 | 0.44 | 0.07 | 0.64  | Eclipse_AMIP      |
| Hurdal           | -0.06 | 0.06 | -0.45 | 0.46 | 0.08 | 0.63  | Eclipse_AMIP_NCEP |
| Hurdal           | -0.06 | 0.06 | -0.45 | 0.45 | 0.08 | 0.62  | Eclipse_CplHist1  |
| Hurdal           | -0.06 | 0.06 | -0.42 | 0.46 | 0.08 | 0.54  | Eclipse_CplHist2  |
| Hurdal           | -0.06 | 0.06 | -0.45 | 0.45 | 0.08 | 0.66  | Eclipse_CplHist3  |
| Hurdal           | -0.03 | 0.04 | -0.21 | 0.28 | 0.05 | 0.61  | CMIP6_Cpl_Hist    |
| Karvatn          | -0.02 | 0.03 | -0.35 | 0.52 | 0.04 | -0.09 | Eclipse_AMIP      |
| Karvatn          | -0.02 | 0.02 | -0.29 | 0.41 | 0.03 | 0.36  | Eclipse_AMIP_NCEP |
| Karvatn          | -0.02 | 0.03 | -0.36 | 0.47 | 0.03 | -0.05 | Eclipse_CplHist1  |
| Karvatn          | -0.02 | 0.03 | -0.28 | 0.50 | 0.03 | -0.13 | Eclipse_CplHist2  |
| Karvatn          | -0.02 | 0.03 | -0.37 | 0.47 | 0.03 | 0.08  | Eclipse_CplHist3  |
| Karvatn          | -0.02 | 0.02 | -0.31 | 0.43 | 0.03 | 0.04  | CMIP6_Cpl_Hist    |

|                  |       |      |       |      |      |       |                   |
|------------------|-------|------|-------|------|------|-------|-------------------|
| TrapperCreek     | -0.03 | 0.04 | -0.61 | 0.69 | 0.05 | 0.69  | Eclipse_AMIP      |
| TrapperCreek     | -0.02 | 0.04 | -0.42 | 0.66 | 0.05 | 0.72  | Eclipse_AMIP_NCEP |
| TrapperCreek     | -0.03 | 0.04 | -0.57 | 0.70 | 0.05 | 0.57  | Eclipse_CplHist1  |
| TrapperCreek     | -0.03 | 0.04 | -0.54 | 0.70 | 0.06 | 0.47  | Eclipse_CplHist2  |
| TrapperCreek     | -0.03 | 0.04 | -0.52 | 0.69 | 0.05 | 0.62  | Eclipse_CplHist3  |
| TrapperCreek     | -0.03 | 0.04 | -0.46 | 0.76 | 0.07 | 0.53  | CMIP6_Cpl_Hist    |
| Utqiagvik        | -0.02 | 0.03 | -0.74 | 0.90 | 0.04 | -0.23 | Eclipse_AMIP      |
| Utqiagvik        | -0.02 | 0.03 | -0.67 | 0.88 | 0.04 | -0.12 | Eclipse_AMIP_NCEP |
| Utqiagvik        | -0.02 | 0.03 | -0.67 | 0.94 | 0.04 | -0.23 | Eclipse_CplHist1  |
| Utqiagvik        | -0.02 | 0.03 | -0.69 | 0.92 | 0.04 | -0.21 | Eclipse_CplHist2  |
| Utqiagvik        | -0.02 | 0.03 | -0.69 | 0.93 | 0.04 | -0.21 | Eclipse_CplHist3  |
| Utqiagvik        | 0.00  | 0.03 | 0.10  | 0.83 | 0.04 | -0.04 | CMIP6_Cpl_Hist    |
| ZeppelinMountain | -0.02 | 0.02 | -0.83 | 0.83 | 0.03 | 0.38  | Eclipse_AMIP      |
| ZeppelinMountain | -0.02 | 0.02 | -0.84 | 0.84 | 0.03 | 0.48  | Eclipse_AMIP_NCEP |
| ZeppelinMountain | -0.02 | 0.02 | -0.80 | 0.81 | 0.03 | 0.32  | Eclipse_CplHist1  |
| ZeppelinMountain | -0.02 | 0.02 | -0.81 | 0.82 | 0.03 | 0.40  | Eclipse_CplHist2  |
| ZeppelinMountain | -0.02 | 0.02 | -0.81 | 0.82 | 0.03 | 0.39  | Eclipse_CplHist3  |
| ZeppelinMountain | -0.02 | 0.02 | -0.74 | 0.77 | 0.03 | 0.23  | CMIP6_Cpl_Hist    |

Table S4. Model evaluation over the individual monitoring stations for organic carbon (OC). Statistics used are mean bias (*MB*), mean gross error (*MGE*), normalized mean bias (*NMB*), normalized mean gross error (*NMGE*), root mean square error (*RMSE*), and Pearson's correlation (*r*).

| Station          | <i>MB</i> | <i>MGE</i> | <i>NMB</i> | <i>NMGE</i> | <i>RMSE</i> | <i>r</i> | Simulation        |
|------------------|-----------|------------|------------|-------------|-------------|----------|-------------------|
| Alert            | -0.13     | 0.14       | -0.83      | 0.88        | 0.16        | 0.01     | Eclipse_AMIP      |
| Alert            | -0.13     | 0.13       | -0.83      | 0.84        | 0.15        | 0.24     | Eclipse_AMIP_NCEP |
| Alert            | -0.12     | 0.13       | -0.79      | 0.81        | 0.15        | 0.04     | Eclipse_CplHist1  |
| Alert            | -0.12     | 0.13       | -0.79      | 0.82        | 0.15        | 0.11     | Eclipse_CplHist2  |
| Alert            | -0.12     | 0.12       | -0.79      | 0.81        | 0.15        | 0.21     | Eclipse_CplHist3  |
| Alert            | -0.11     | 0.12       | -0.72      | 0.77        | 0.14        | 0.09     | CMIP6_Cpl_Hist    |
| Denali           | -0.20     | 0.44       | -0.31      | 0.66        | 1.59        | 0.69     | Eclipse_AMIP      |
| Denali           | 0.03      | 0.46       | 0.05       | 0.69        | 1.34        | 0.77     | Eclipse_AMIP_NCEP |
| Denali           | -0.10     | 0.49       | -0.15      | 0.74        | 1.68        | 0.59     | Eclipse_CplHist1  |
| Denali           | -0.07     | 0.48       | -0.11      | 0.73        | 1.76        | 0.52     | Eclipse_CplHist2  |
| Denali           | -0.05     | 0.45       | -0.07      | 0.68        | 1.55        | 0.67     | Eclipse_CplHist3  |
| Denali           | 0.17      | 0.56       | 0.26       | 0.84        | 1.74        | 0.62     | CMIP6_Cpl_Hist    |
| GatesOfTheArctic | -0.28     | 0.38       | -0.44      | 0.59        | 0.68        | 0.90     | Eclipse_AMIP      |
| GatesOfTheArctic | -0.18     | 0.30       | -0.29      | 0.47        | 0.55        | 0.93     | Eclipse_AMIP_NCEP |
| GatesOfTheArctic | -0.16     | 0.30       | -0.25      | 0.46        | 0.52        | 0.94     | Eclipse_CplHist1  |
| GatesOfTheArctic | -0.13     | 0.23       | -0.20      | 0.37        | 0.41        | 0.96     | Eclipse_CplHist2  |
| GatesOfTheArctic | -0.12     | 0.26       | -0.19      | 0.41        | 0.43        | 0.95     | Eclipse_CplHist3  |
| GatesOfTheArctic | -0.06     | 0.38       | -0.10      | 0.59        | 1.01        | 0.84     | CMIP6_Cpl_Hist    |



|              |       |      |       |      |      |       |                   |
|--------------|-------|------|-------|------|------|-------|-------------------|
| Hurdal       | -0.60 | 0.73 | -0.52 | 0.64 | 0.98 | -0.50 | Eclipse_AMIP      |
| Hurdal       | -0.65 | 0.77 | -0.57 | 0.67 | 0.98 | -0.26 | Eclipse_AMIP_NCEP |
| Hurdal       | -0.59 | 0.69 | -0.51 | 0.61 | 0.93 | -0.54 | Eclipse_CplHist1  |
| Hurdal       | -0.58 | 0.72 | -0.50 | 0.63 | 0.92 | -0.48 | Eclipse_CplHist2  |
| Hurdal       | -0.66 | 0.74 | -0.57 | 0.65 | 0.97 | -0.49 | Eclipse_CplHist3  |
| Hurdal       | -0.44 | 0.65 | -0.39 | 0.57 | 0.87 | -0.62 | CMIP6_Cpl_Hist    |
| Karvatn      | -0.67 | 0.67 | -0.82 | 0.83 | 0.89 | -0.24 | Eclipse_AMIP      |
| Karvatn      | -0.64 | 0.66 | -0.79 | 0.80 | 0.88 | -0.25 | Eclipse_AMIP_NCEP |
| Karvatn      | -0.68 | 0.68 | -0.83 | 0.83 | 0.89 | -0.35 | Eclipse_CplHist1  |
| Karvatn      | -0.66 | 0.67 | -0.81 | 0.82 | 0.88 | -0.23 | Eclipse_CplHist2  |
| Karvatn      | -0.68 | 0.69 | -0.84 | 0.84 | 0.89 | -0.20 | Eclipse_CplHist3  |
| Karvatn      | -0.62 | 0.63 | -0.76 | 0.77 | 0.85 | -0.36 | CMIP6_Cpl_Hist    |
| TrapperCreek | 0.06  | 0.32 | 0.13  | 0.73 | 0.71 | 0.74  | Eclipse_AMIP      |
| TrapperCreek | 0.33  | 0.49 | 0.76  | 1.12 | 1.17 | 0.80  | Eclipse_AMIP_NCEP |
| TrapperCreek | 0.14  | 0.39 | 0.32  | 0.88 | 0.86 | 0.63  | Eclipse_CplHist1  |
| TrapperCreek | 0.20  | 0.44 | 0.45  | 1.00 | 1.05 | 0.52  | Eclipse_CplHist2  |
| TrapperCreek | 0.23  | 0.41 | 0.53  | 0.92 | 0.99 | 0.68  | Eclipse_CplHist3  |
| TrapperCreek | 0.50  | 0.61 | 1.13  | 1.39 | 1.97 | 0.63  | CMIP6_Cpl_Hist    |

Table S5. Model evaluation over the individual monitoring stations for sulfate (SO<sub>4</sub><sup>2-</sup>). Statistics used are mean bias (*MB*), mean gross error (*MGE*), normalized mean bias (*NMB*), normalized mean gross error (*NMGE*), root mean square error (*RMSE*), and Pearson's correlation (*r*).

| Station          | <i>MB</i> | <i>MGE</i> | <i>NMB</i> | <i>NMGE</i> | <i>RMSE</i> | <i>r</i> | Simulation        |
|------------------|-----------|------------|------------|-------------|-------------|----------|-------------------|
| Alert            | -0.34     | 0.37       | -0.72      | 0.77        | 0.48        | 0.38     | Eclipse_AMIP      |
| Alert            | -0.37     | 0.37       | -0.77      | 0.78        | 0.49        | 0.50     | Eclipse_AMIP_NCEP |
| Alert            | -0.34     | 0.36       | -0.72      | 0.76        | 0.48        | 0.44     | Eclipse_CplHist1  |
| Alert            | -0.34     | 0.35       | -0.72      | 0.75        | 0.47        | 0.48     | Eclipse_CplHist2  |
| Alert            | -0.34     | 0.36       | -0.72      | 0.75        | 0.47        | 0.46     | Eclipse_CplHist3  |
| Alert            | -0.32     | 0.34       | -0.68      | 0.72        | 0.45        | 0.51     | CMIP6_Cpl_Hist    |
| Denali           | -0.15     | 0.17       | -0.46      | 0.53        | 0.24        | 0.38     | Eclipse_AMIP      |
| Denali           | -0.16     | 0.17       | -0.50      | 0.52        | 0.23        | 0.67     | Eclipse_AMIP_NCEP |
| Denali           | -0.14     | 0.16       | -0.45      | 0.50        | 0.23        | 0.48     | Eclipse_CplHist1  |
| Denali           | -0.14     | 0.16       | -0.43      | 0.49        | 0.23        | 0.46     | Eclipse_CplHist2  |
| Denali           | -0.14     | 0.16       | -0.42      | 0.48        | 0.22        | 0.51     | Eclipse_CplHist3  |
| Denali           | -0.09     | 0.14       | -0.28      | 0.43        | 0.20        | 0.54     | CMIP6_Cpl_Hist    |
| Fairbanks        | 0.00      | 0.19       | 0.02       | 1.04        | 0.24        | -0.36    | Eclipse_AMIP      |
| Fairbanks        | 0.02      | 0.20       | 0.09       | 1.07        | 0.25        | -0.28    | Eclipse_AMIP_NCEP |
| Fairbanks        | 0.00      | 0.19       | 0.03       | 1.05        | 0.24        | -0.35    | Eclipse_CplHist1  |
| Fairbanks        | 0.01      | 0.19       | 0.06       | 1.02        | 0.23        | -0.34    | Eclipse_CplHist2  |
| Fairbanks        | 0.01      | 0.19       | 0.06       | 1.02        | 0.23        | -0.31    | Eclipse_CplHist3  |
| Fairbanks        | 0.08      | 0.23       | 0.46       | 1.22        | 0.27        | -0.32    | CMIP6_Cpl_Hist    |
| GatesoftheArctic | -0.25     | 0.26       | -0.64      | 0.66        | 0.36        | 0.53     | Eclipse_AMIP      |

|                  |       |      |       |      |      |      |                   |
|------------------|-------|------|-------|------|------|------|-------------------|
| GatesoftheArctic | -0.26 | 0.26 | -0.65 | 0.66 | 0.36 | 0.64 | Eclipse_AMIP_NCEP |
| GatesoftheArctic | -0.25 | 0.26 | -0.64 | 0.66 | 0.37 | 0.49 | Eclipse_CplHist1  |
| GatesoftheArctic | -0.24 | 0.25 | -0.61 | 0.63 | 0.36 | 0.48 | Eclipse_CplHist2  |
| GatesoftheArctic | -0.25 | 0.25 | -0.63 | 0.64 | 0.36 | 0.52 | Eclipse_CplHist3  |
| GatesoftheArctic | -0.20 | 0.22 | -0.51 | 0.55 | 0.31 | 0.64 | CMIP6_Cpl_Hist    |
| Hurdal           | -0.55 | 0.57 | -0.60 | 0.62 | 0.72 | 0.28 | Eclipse_AMIP      |
| Hurdal           | -0.54 | 0.55 | -0.59 | 0.59 | 0.65 | 0.69 | Eclipse_AMIP_NCEP |
| Hurdal           | -0.55 | 0.58 | -0.60 | 0.63 | 0.72 | 0.29 | Eclipse_CplHist1  |
| Hurdal           | -0.52 | 0.55 | -0.57 | 0.60 | 0.69 | 0.34 | Eclipse_CplHist2  |
| Hurdal           | -0.54 | 0.57 | -0.59 | 0.62 | 0.72 | 0.27 | Eclipse_CplHist3  |
| Hurdal           | -0.49 | 0.53 | -0.53 | 0.57 | 0.68 | 0.29 | CMIP6_Cpl_Hist    |
| Karasjok         | -0.48 | 0.52 | -0.58 | 0.61 | 0.67 | 0.24 | Eclipse_AMIP      |
| Karasjok         | -0.50 | 0.50 | -0.60 | 0.60 | 0.63 | 0.55 | Eclipse_AMIP_NCEP |
| Karasjok         | -0.46 | 0.49 | -0.55 | 0.58 | 0.65 | 0.28 | Eclipse_CplHist1  |
| Karasjok         | -0.47 | 0.48 | -0.56 | 0.57 | 0.65 | 0.29 | Eclipse_CplHist2  |
| Karasjok         | -0.46 | 0.48 | -0.55 | 0.57 | 0.64 | 0.34 | Eclipse_CplHist3  |
| Karasjok         | -0.38 | 0.42 | -0.46 | 0.50 | 0.59 | 0.35 | CMIP6_Cpl_Hist    |
| Karvatn          | -0.16 | 0.26 | -0.29 | 0.49 | 0.39 | 0.39 | Eclipse_AMIP      |
| Karvatn          | -0.19 | 0.20 | -0.35 | 0.38 | 0.30 | 0.76 | Eclipse_AMIP_NCEP |
| Karvatn          | -0.19 | 0.25 | -0.35 | 0.47 | 0.38 | 0.44 | Eclipse_CplHist1  |
| Karvatn          | -0.16 | 0.24 | -0.31 | 0.46 | 0.37 | 0.45 | Eclipse_CplHist2  |
| Karvatn          | -0.18 | 0.24 | -0.34 | 0.45 | 0.36 | 0.50 | Eclipse_CplHist3  |
| Karvatn          | -0.13 | 0.23 | -0.24 | 0.42 | 0.35 | 0.48 | CMIP6_Cpl_Hist    |

|              |       |      |       |      |      |      |                   |
|--------------|-------|------|-------|------|------|------|-------------------|
| TrapperCreek | -0.16 | 0.17 | -0.49 | 0.52 | 0.25 | 0.52 | Eclipse_AMIP      |
| TrapperCreek | -0.17 | 0.17 | -0.52 | 0.52 | 0.23 | 0.75 | Eclipse_AMIP_NCEP |
| TrapperCreek | -0.16 | 0.17 | -0.49 | 0.50 | 0.24 | 0.61 | Eclipse_CplHist1  |
| TrapperCreek | -0.15 | 0.17 | -0.46 | 0.51 | 0.24 | 0.51 | Eclipse_CplHist2  |
| TrapperCreek | -0.15 | 0.16 | -0.46 | 0.49 | 0.23 | 0.60 | Eclipse_CplHist3  |
| TrapperCreek | -0.11 | 0.14 | -0.32 | 0.42 | 0.21 | 0.60 | CMIP6_Cpl_Hist    |
| Tustervatn   | -0.22 | 0.29 | -0.39 | 0.52 | 0.40 | 0.37 | Eclipse_AMIP      |
| Tustervatn   | -0.26 | 0.27 | -0.46 | 0.47 | 0.35 | 0.72 | Eclipse_AMIP_NCEP |
| Tustervatn   | -0.25 | 0.29 | -0.44 | 0.52 | 0.42 | 0.36 | Eclipse_CplHist1  |
| Tustervatn   | -0.23 | 0.29 | -0.40 | 0.51 | 0.40 | 0.38 | Eclipse_CplHist2  |
| Tustervatn   | -0.24 | 0.28 | -0.43 | 0.50 | 0.40 | 0.41 | Eclipse_CplHist3  |
| Tustervatn   | -0.18 | 0.26 | -0.32 | 0.46 | 0.38 | 0.40 | CMIP6_Cpl_Hist    |
| Utqiagvik    | -0.25 | 0.29 | -0.61 | 0.70 | 0.37 | 0.16 | Eclipse_AMIP      |
| Utqiagvik    | -0.23 | 0.28 | -0.56 | 0.68 | 0.35 | 0.24 | Eclipse_AMIP_NCEP |
| Utqiagvik    | -0.24 | 0.29 | -0.59 | 0.69 | 0.37 | 0.13 | Eclipse_CplHist1  |
| Utqiagvik    | -0.24 | 0.29 | -0.59 | 0.69 | 0.37 | 0.15 | Eclipse_CplHist2  |
| Utqiagvik    | -0.25 | 0.28 | -0.60 | 0.68 | 0.36 | 0.22 | Eclipse_CplHist3  |
| Utqiagvik    | -0.20 | 0.26 | -0.48 | 0.63 | 0.33 | 0.27 | CMIP6_Cpl_Hist    |
| VillumNord   | -0.26 | 0.30 | -0.64 | 0.72 | 0.41 | 0.41 | Eclipse_AMIP      |
| VillumNord   | -0.28 | 0.30 | -0.68 | 0.72 | 0.41 | 0.49 | Eclipse_AMIP_NCEP |
| VillumNord   | -0.26 | 0.29 | -0.63 | 0.72 | 0.41 | 0.41 | Eclipse_CplHist1  |
| VillumNord   | -0.26 | 0.29 | -0.64 | 0.70 | 0.40 | 0.48 | Eclipse_CplHist2  |
| VillumNord   | -0.26 | 0.29 | -0.64 | 0.70 | 0.40 | 0.50 | Eclipse_CplHist3  |

|                  |       |      |       |      |      |      |                   |
|------------------|-------|------|-------|------|------|------|-------------------|
| VillumNord       | -0.24 | 0.27 | -0.59 | 0.67 | 0.38 | 0.51 | CMIP6_Cpl_Hist    |
| ZeppelinMountain | 0.04  | 0.11 | 0.29  | 0.80 | 0.16 | 0.34 | Eclipse_AMIP      |
| ZeppelinMountain | 0.03  | 0.08 | 0.18  | 0.62 | 0.11 | 0.59 | Eclipse_AMIP_NCEP |
| ZeppelinMountain | 0.05  | 0.11 | 0.39  | 0.80 | 0.15 | 0.49 | Eclipse_CplHist1  |
| ZeppelinMountain | 0.05  | 0.11 | 0.37  | 0.79 | 0.15 | 0.47 | Eclipse_CplHist2  |
| ZeppelinMountain | 0.05  | 0.10 | 0.33  | 0.74 | 0.15 | 0.52 | Eclipse_CplHist3  |
| ZeppelinMountain | 0.08  | 0.12 | 0.56  | 0.89 | 0.17 | 0.52 | CMIP6_Cpl_Hist    |

Table S6. Model evaluation over the individual Aeronet monitoring stations for aerosol optical depth at 550 nm. Statistics used are mean bias (*MB*), mean gross error (*MGE*), normalized mean bias (*NMB*), normalized mean gross error (*NMGE*), root mean square error (*RMSE*), and Pearson's correlation (*r*).

| Station             | <i>MB</i> | <i>MGE</i> | <i>NMB</i> | <i>NMGE</i> | <i>RMSE</i> | <i>r</i> | Simulation        |
|---------------------|-----------|------------|------------|-------------|-------------|----------|-------------------|
| Andenes             | -0.02     | 0.05       | -0.22      | 0.49        | 0.06        | 0.03     | Eclipse_AMIP      |
| Andenes             | -0.03     | 0.04       | -0.30      | 0.36        | 0.04        | 0.35     | Eclipse_AMIP_NCEP |
| Andenes             | -0.04     | 0.05       | -0.43      | 0.46        | 0.05        | 0.04     | Eclipse_CplHist1  |
| Andenes             | -0.03     | 0.04       | -0.32      | 0.43        | 0.05        | 0.22     | Eclipse_CplHist2  |
| Andenes             | -0.01     | 0.05       | -0.13      | 0.47        | 0.06        | -0.09    | Eclipse_CplHist3  |
| Andenes             | -0.03     | 0.04       | -0.29      | 0.36        | 0.04        | 0.20     | CMIP6_Cpl_Hist    |
| ARM_HyytialaFinland | 0.00      | 0.06       | 0.00       | 0.65        | 0.07        | -0.73    | Eclipse_AMIP      |
| ARM_HyytialaFinland | -0.02     | 0.04       | -0.23      | 0.46        | 0.04        | -0.51    | Eclipse_AMIP_NCEP |
| ARM_HyytialaFinland | -0.02     | 0.05       | -0.21      | 0.55        | 0.05        | -0.68    | Eclipse_CplHist1  |
| ARM_HyytialaFinland | -0.02     | 0.05       | -0.18      | 0.62        | 0.05        | -0.88    | Eclipse_CplHist2  |
| ARM_HyytialaFinland | -0.03     | 0.04       | -0.30      | 0.42        | 0.04        | -0.46    | Eclipse_CplHist3  |
| ARM_HyytialaFinland | -0.02     | 0.04       | -0.20      | 0.44        | 0.04        | -0.73    | CMIP6_Cpl_Hist    |
| Barrow              | -0.08     | 0.08       | -0.55      | 0.58        | 0.10        | 0.34     | Eclipse_AMIP      |
| Barrow              | -0.09     | 0.09       | -0.62      | 0.63        | 0.11        | 0.44     | Eclipse_AMIP_NCEP |
| Barrow              | -0.09     | 0.09       | -0.65      | 0.66        | 0.12        | 0.22     | Eclipse_CplHist1  |
| Barrow              | -0.09     | 0.09       | -0.64      | 0.66        | 0.11        | 0.35     | Eclipse_CplHist2  |
| Barrow              | -0.08     | 0.09       | -0.62      | 0.63        | 0.11        | 0.28     | Eclipse_CplHist3  |
| Barrow              | -0.08     | 0.08       | -0.56      | 0.59        | 0.11        | 0.02     | CMIP6_Cpl_Hist    |

|               |       |      |       |      |      |       |                   |
|---------------|-------|------|-------|------|------|-------|-------------------|
| Bonanza_Creek | -0.08 | 0.09 | -0.57 | 0.61 | 0.16 | 0.13  | Eclipse_AMIP      |
| Bonanza_Creek | -0.08 | 0.08 | -0.56 | 0.57 | 0.15 | 0.52  | Eclipse_AMIP_NCEP |
| Bonanza_Creek | -0.10 | 0.10 | -0.67 | 0.70 | 0.17 | 0.00  | Eclipse_CplHist1  |
| Bonanza_Creek | -0.10 | 0.10 | -0.66 | 0.66 | 0.17 | 0.28  | Eclipse_CplHist2  |
| Bonanza_Creek | -0.09 | 0.09 | -0.64 | 0.66 | 0.17 | 0.31  | Eclipse_CplHist3  |
| Bonanza_Creek | -0.09 | 0.09 | -0.59 | 0.62 | 0.17 | 0.09  | CMIP6_Cpl_Hist    |
| Helsinki      | 0.00  | 0.06 | -0.05 | 0.64 | 0.08 | -0.51 | Eclipse_AMIP      |
| Helsinki      | -0.02 | 0.04 | -0.25 | 0.47 | 0.05 | -0.35 | Eclipse_AMIP_NCEP |
| Helsinki      | 0.00  | 0.07 | 0.02  | 0.75 | 0.10 | -0.54 | Eclipse_CplHist1  |
| Helsinki      | -0.03 | 0.04 | -0.27 | 0.39 | 0.04 | -0.14 | Eclipse_CplHist2  |
| Helsinki      | -0.02 | 0.05 | -0.19 | 0.50 | 0.05 | -0.68 | Eclipse_CplHist3  |
| Helsinki      | -0.01 | 0.06 | -0.10 | 0.59 | 0.07 | -0.66 | CMIP6_Cpl_Hist    |
| Hornsund      | -0.04 | 0.04 | -0.38 | 0.42 | 0.05 | 0.40  | Eclipse_AMIP      |
| Hornsund      | -0.05 | 0.05 | -0.48 | 0.48 | 0.06 | 0.31  | Eclipse_AMIP_NCEP |
| Hornsund      | -0.04 | 0.05 | -0.43 | 0.49 | 0.06 | 0.07  | Eclipse_CplHist1  |
| Hornsund      | -0.04 | 0.05 | -0.39 | 0.48 | 0.06 | 0.14  | Eclipse_CplHist2  |
| Hornsund      | -0.03 | 0.04 | -0.31 | 0.41 | 0.06 | 0.25  | Eclipse_CplHist3  |
| Hornsund      | -0.04 | 0.05 | -0.43 | 0.48 | 0.06 | -0.07 | CMIP6_Cpl_Hist    |
| Hyytiala      | -0.02 | 0.04 | -0.23 | 0.44 | 0.05 | -0.31 | Eclipse_AMIP      |
| Hyytiala      | -0.03 | 0.05 | -0.26 | 0.50 | 0.06 | -0.50 | Eclipse_AMIP_NCEP |
| Hyytiala      | 0.00  | 0.06 | -0.03 | 0.61 | 0.10 | -0.32 | Eclipse_CplHist1  |
| Hyytiala      | -0.02 | 0.03 | -0.22 | 0.35 | 0.04 | 0.09  | Eclipse_CplHist2  |
| Hyytiala      | -0.03 | 0.04 | -0.32 | 0.44 | 0.05 | -0.09 | Eclipse_CplHist3  |

|                  |       |      |       |      |      |       |                   |
|------------------|-------|------|-------|------|------|-------|-------------------|
| Hyytiala         | -0.02 | 0.05 | -0.18 | 0.49 | 0.06 | -0.31 | CMIP6_Cpl_Hist    |
| Iqaluit          | -0.01 | 0.04 | -0.10 | 0.42 | 0.06 | 0.01  | Eclipse_AMIP      |
| Iqaluit          | -0.02 | 0.05 | -0.20 | 0.49 | 0.07 | 0.07  | Eclipse_AMIP_NCEP |
| Iqaluit          | -0.03 | 0.04 | -0.35 | 0.45 | 0.06 | -0.13 | Eclipse_CplHist1  |
| Iqaluit          | -0.02 | 0.04 | -0.18 | 0.47 | 0.06 | 0.18  | Eclipse_CplHist2  |
| Iqaluit          | -0.02 | 0.05 | -0.21 | 0.52 | 0.07 | -0.17 | Eclipse_CplHist3  |
| Iqaluit          | -0.02 | 0.04 | -0.22 | 0.39 | 0.06 | 0.14  | CMIP6_Cpl_Hist    |
| Ittoqqortoormiit | -0.01 | 0.02 | -0.20 | 0.24 | 0.02 | 0.71  | Eclipse_AMIP      |
| Ittoqqortoormiit | -0.03 | 0.03 | -0.35 | 0.35 | 0.03 | 0.72  | Eclipse_AMIP_NCEP |
| Ittoqqortoormiit | -0.03 | 0.04 | -0.43 | 0.49 | 0.04 | -0.07 | Eclipse_CplHist1  |
| Ittoqqortoormiit | -0.03 | 0.03 | -0.41 | 0.44 | 0.03 | 0.02  | Eclipse_CplHist2  |
| Ittoqqortoormiit | -0.02 | 0.03 | -0.34 | 0.39 | 0.03 | 0.43  | Eclipse_CplHist3  |
| Ittoqqortoormiit | -0.02 | 0.03 | -0.26 | 0.35 | 0.03 | 0.01  | CMIP6_Cpl_Hist    |
| Kangerlussuaq    | 0.03  | 0.05 | 0.37  | 0.64 | 0.09 | 0.50  | Eclipse_AMIP      |
| Kangerlussuaq    | 0.01  | 0.04 | 0.08  | 0.49 | 0.05 | 0.22  | Eclipse_AMIP_NCEP |
| Kangerlussuaq    | -0.02 | 0.03 | -0.32 | 0.36 | 0.03 | 0.04  | Eclipse_CplHist1  |
| Kangerlussuaq    | -0.02 | 0.02 | -0.24 | 0.29 | 0.03 | 0.35  | Eclipse_CplHist2  |
| Kangerlussuaq    | -0.01 | 0.03 | -0.07 | 0.41 | 0.04 | 0.40  | Eclipse_CplHist3  |
| Kangerlussuaq    | 0.00  | 0.03 | -0.05 | 0.38 | 0.03 | 0.06  | CMIP6_Cpl_Hist    |
| Kuopio           | -0.04 | 0.04 | -0.41 | 0.44 | 0.05 | -0.19 | Eclipse_AMIP      |
| Kuopio           | -0.04 | 0.04 | -0.43 | 0.46 | 0.05 | -0.18 | Eclipse_AMIP_NCEP |
| Kuopio           | -0.04 | 0.04 | -0.46 | 0.46 | 0.05 | -0.16 | Eclipse_CplHist1  |
| Kuopio           | -0.04 | 0.04 | -0.40 | 0.41 | 0.05 | 0.23  | Eclipse_CplHist2  |



|              |       |      |       |      |      |       |                   |
|--------------|-------|------|-------|------|------|-------|-------------------|
| Kuopio       | -0.04 | 0.04 | -0.40 | 0.41 | 0.05 | -0.06 | Eclipse_CplHist3  |
| Kuopio       | -0.04 | 0.04 | -0.40 | 0.41 | 0.05 | 0.10  | CMIP6_Cpl_Hist    |
| Narsarsuaq   | -0.01 | 0.02 | -0.10 | 0.24 | 0.02 | -0.22 | Eclipse_AMIP      |
| Narsarsuaq   | 0.00  | 0.02 | -0.03 | 0.30 | 0.03 | -0.18 | Eclipse_AMIP_NCEP |
| Narsarsuaq   | -0.02 | 0.03 | -0.23 | 0.35 | 0.03 | -0.99 | Eclipse_CplHist1  |
| Narsarsuaq   | -0.01 | 0.02 | -0.14 | 0.23 | 0.02 | -0.79 | Eclipse_CplHist2  |
| Narsarsuaq   | -0.02 | 0.02 | -0.33 | 0.33 | 0.03 | -0.15 | Eclipse_CplHist3  |
| Narsarsuaq   | 0.02  | 0.04 | 0.34  | 0.52 | 0.06 | -0.03 | CMIP6_Cpl_Hist    |
| OPAL         | -0.03 | 0.03 | -0.41 | 0.45 | 0.04 | 0.57  | Eclipse_AMIP      |
| OPAL         | -0.03 | 0.03 | -0.44 | 0.46 | 0.04 | 0.30  | Eclipse_AMIP_NCEP |
| OPAL         | -0.03 | 0.04 | -0.47 | 0.57 | 0.05 | -0.39 | Eclipse_CplHist1  |
| OPAL         | -0.03 | 0.04 | -0.44 | 0.49 | 0.04 | 0.23  | Eclipse_CplHist2  |
| OPAL         | -0.03 | 0.04 | -0.45 | 0.50 | 0.04 | 0.18  | Eclipse_CplHist3  |
| OPAL         | -0.02 | 0.04 | -0.29 | 0.56 | 0.05 | -0.69 | CMIP6_Cpl_Hist    |
| PEARL        | -0.03 | 0.03 | -0.41 | 0.42 | 0.04 | 0.54  | Eclipse_AMIP      |
| PEARL        | -0.03 | 0.04 | -0.43 | 0.51 | 0.05 | 0.04  | Eclipse_AMIP_NCEP |
| PEARL        | -0.03 | 0.04 | -0.47 | 0.50 | 0.05 | -0.01 | Eclipse_CplHist1  |
| PEARL        | -0.03 | 0.03 | -0.44 | 0.46 | 0.04 | 0.19  | Eclipse_CplHist2  |
| PEARL        | -0.03 | 0.03 | -0.35 | 0.42 | 0.04 | 0.12  | Eclipse_CplHist3  |
| PEARL        | -0.03 | 0.04 | -0.35 | 0.49 | 0.05 | -0.28 | CMIP6_Cpl_Hist    |
| Resolute_Bay | -0.04 | 0.04 | -0.46 | 0.47 | 0.06 | 0.39  | Eclipse_AMIP      |
| Resolute_Bay | -0.04 | 0.04 | -0.43 | 0.43 | 0.05 | 0.56  | Eclipse_AMIP_NCEP |
| Resolute_Bay | -0.04 | 0.05 | -0.49 | 0.50 | 0.06 | 0.24  | Eclipse_CplHist1  |

|              |       |      |       |      |      |       |                   |
|--------------|-------|------|-------|------|------|-------|-------------------|
| Resolute_Bay | -0.04 | 0.04 | -0.48 | 0.48 | 0.06 | 0.45  | Eclipse_CplHist2  |
| Resolute_Bay | -0.04 | 0.04 | -0.45 | 0.47 | 0.05 | 0.48  | Eclipse_CplHist3  |
| Resolute_Bay | -0.03 | 0.04 | -0.36 | 0.40 | 0.05 | 0.05  | CMIP6_Cpl_Hist    |
| Sodankyla    | -0.03 | 0.05 | -0.35 | 0.55 | 0.05 | -0.60 | Eclipse_AMIP      |
| Sodankyla    | -0.03 | 0.04 | -0.38 | 0.50 | 0.05 | -0.62 | Eclipse_AMIP_NCEP |
| Sodankyla    | -0.04 | 0.05 | -0.48 | 0.54 | 0.06 | -0.93 | Eclipse_CplHist1  |
| Sodankyla    | -0.03 | 0.06 | -0.36 | 0.68 | 0.06 | -0.81 | Eclipse_CplHist2  |
| Sodankyla    | -0.03 | 0.04 | -0.36 | 0.50 | 0.05 | -0.76 | Eclipse_CplHist3  |
| Sodankyla    | -0.03 | 0.04 | -0.40 | 0.45 | 0.05 | -0.29 | CMIP6_Cpl_Hist    |
| Thule        | -0.04 | 0.04 | -0.43 | 0.49 | 0.05 | 0.07  | Eclipse_AMIP      |
| Thule        | -0.04 | 0.04 | -0.47 | 0.51 | 0.05 | 0.36  | Eclipse_AMIP_NCEP |
| Thule        | -0.04 | 0.05 | -0.52 | 0.56 | 0.05 | 0.05  | Eclipse_CplHist1  |
| Thule        | -0.04 | 0.04 | -0.48 | 0.51 | 0.05 | 0.20  | Eclipse_CplHist2  |
| Thule        | -0.03 | 0.04 | -0.41 | 0.49 | 0.05 | 0.15  | Eclipse_CplHist3  |
| Thule        | -0.03 | 0.04 | -0.35 | 0.49 | 0.05 | -0.26 | CMIP6_Cpl_Hist    |
| Tiksi        | -0.14 | 0.14 | -0.67 | 0.67 | 0.23 | 0.00  | Eclipse_AMIP      |
| Tiksi        | -0.15 | 0.15 | -0.72 | 0.72 | 0.24 | -0.02 | Eclipse_AMIP_NCEP |
| Tiksi        | -0.16 | 0.16 | -0.78 | 0.78 | 0.24 | 0.30  | Eclipse_CplHist1  |
| Tiksi        | -0.16 | 0.16 | -0.76 | 0.76 | 0.24 | 0.03  | Eclipse_CplHist2  |
| Tiksi        | -0.14 | 0.14 | -0.68 | 0.68 | 0.23 | 0.00  | Eclipse_CplHist3  |
| Tiksi        | -0.15 | 0.15 | -0.74 | 0.74 | 0.23 | 0.67  | CMIP6_Cpl_Hist    |
| Yakutsk      | -0.13 | 0.13 | -0.66 | 0.66 | 0.15 | 0.44  | Eclipse_AMIP      |
| Yakutsk      | -0.11 | 0.11 | -0.55 | 0.56 | 0.14 | 0.45  | Eclipse_AMIP_NCEP |

|                    |       |      |       |      |      |       |                   |
|--------------------|-------|------|-------|------|------|-------|-------------------|
| Yakutsk            | -0.12 | 0.12 | -0.60 | 0.62 | 0.15 | 0.38  | Eclipse_CplHist1  |
| Yakutsk            | -0.13 | 0.13 | -0.66 | 0.66 | 0.15 | 0.49  | Eclipse_CplHist2  |
| Yakutsk            | -0.12 | 0.12 | -0.65 | 0.65 | 0.15 | 0.34  | Eclipse_CplHist3  |
| Yakutsk            | -0.10 | 0.11 | -0.54 | 0.57 | 0.14 | 0.36  | CMIP6_Cpl_Hist    |
| Yellowknife_Aurora | -0.07 | 0.10 | -0.46 | 0.63 | 0.17 | -0.35 | Eclipse_AMIP      |
| Yellowknife_Aurora | -0.07 | 0.10 | -0.47 | 0.61 | 0.17 | -0.09 | Eclipse_AMIP_NCEP |
| Yellowknife_Aurora | -0.10 | 0.10 | -0.62 | 0.62 | 0.18 | -0.27 | Eclipse_CplHist1  |
| Yellowknife_Aurora | -0.08 | 0.09 | -0.51 | 0.60 | 0.16 | 0.14  | Eclipse_CplHist2  |
| Yellowknife_Aurora | -0.09 | 0.10 | -0.55 | 0.63 | 0.18 | -0.30 | Eclipse_CplHist3  |
| Yellowknife_Aurora | -0.08 | 0.11 | -0.51 | 0.67 | 0.18 | -0.31 | CMIP6_Cpl_Hist    |

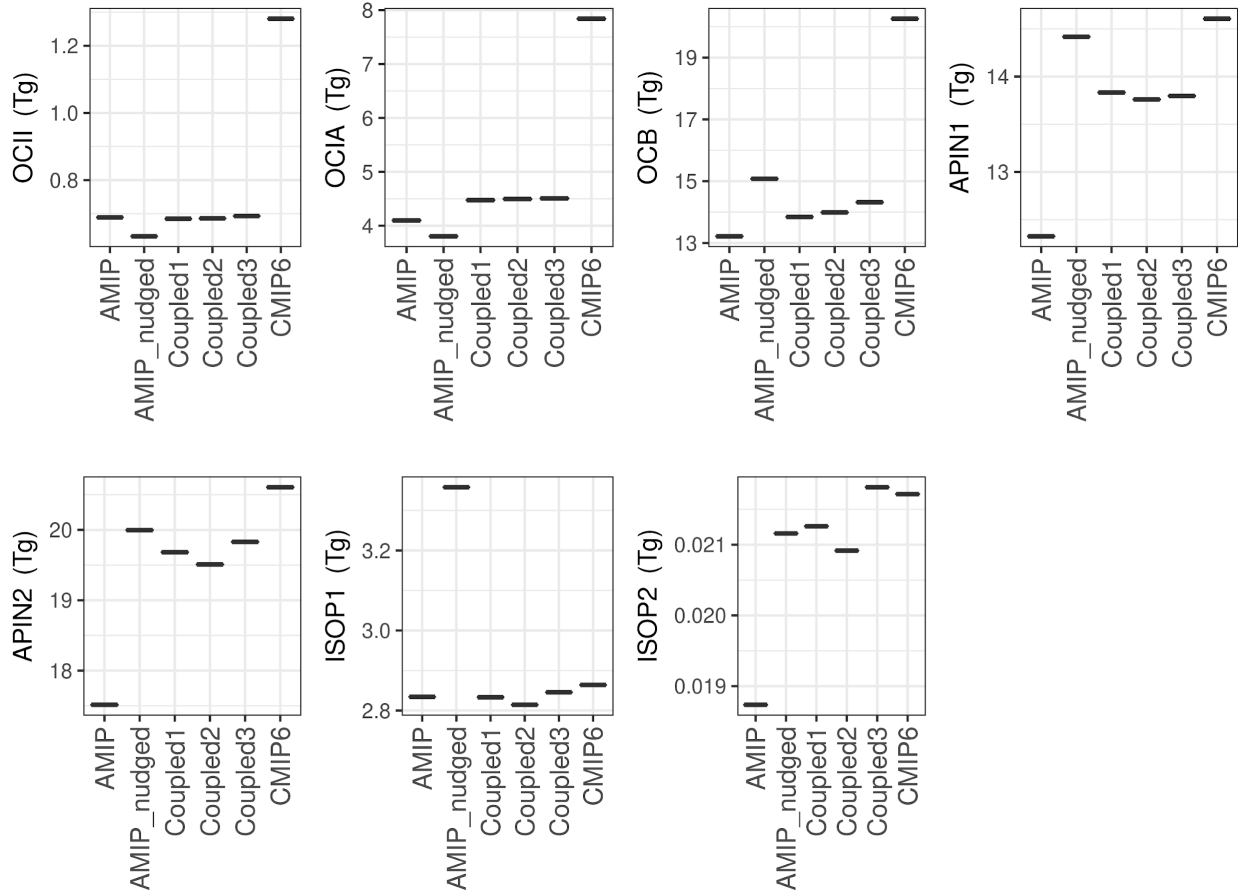

Figure S1. Present day SOA burdens in the Eclipse and CMIP6 ensemble.

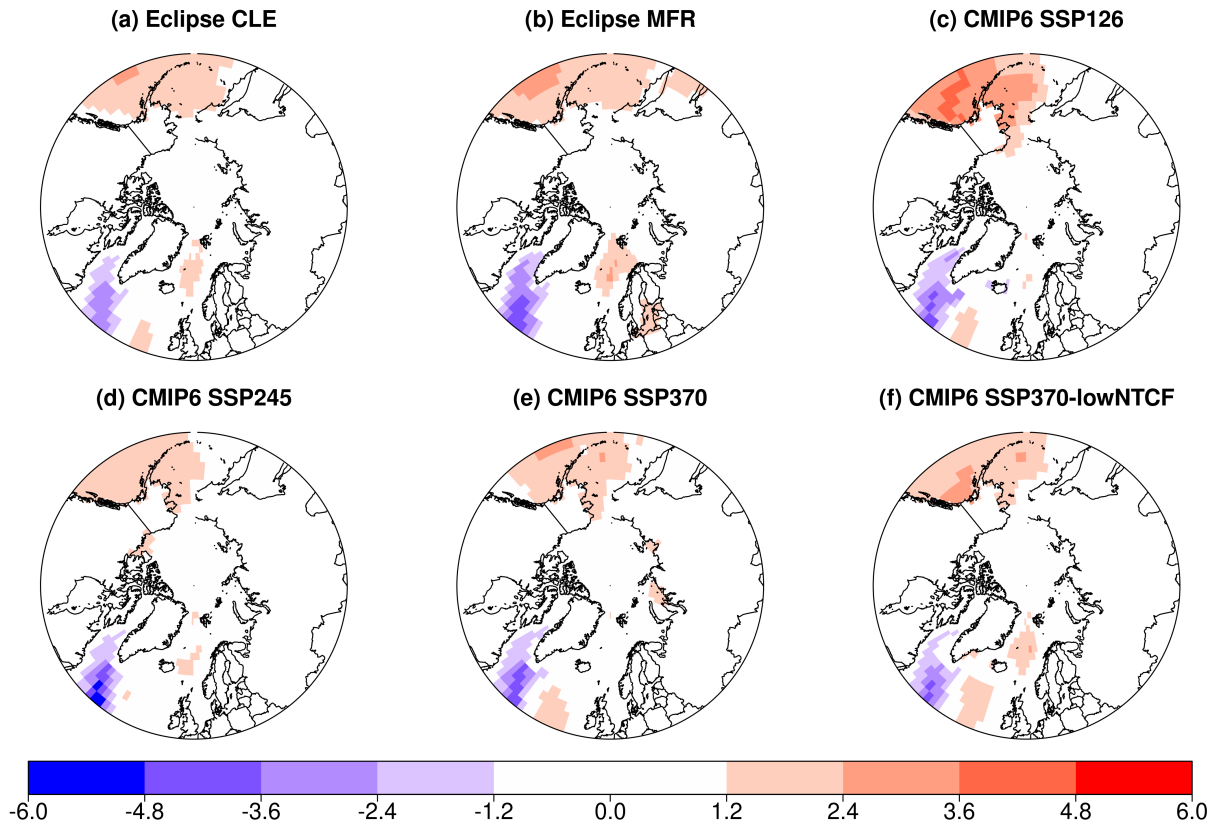

**Figure S2.** Spatial distribution of the annual mean Arctic sea surface temperature (°C) change between the 1990-2010 mean and the 2030-2050 mean as calculated by the GISS-E2.1 ensemble.

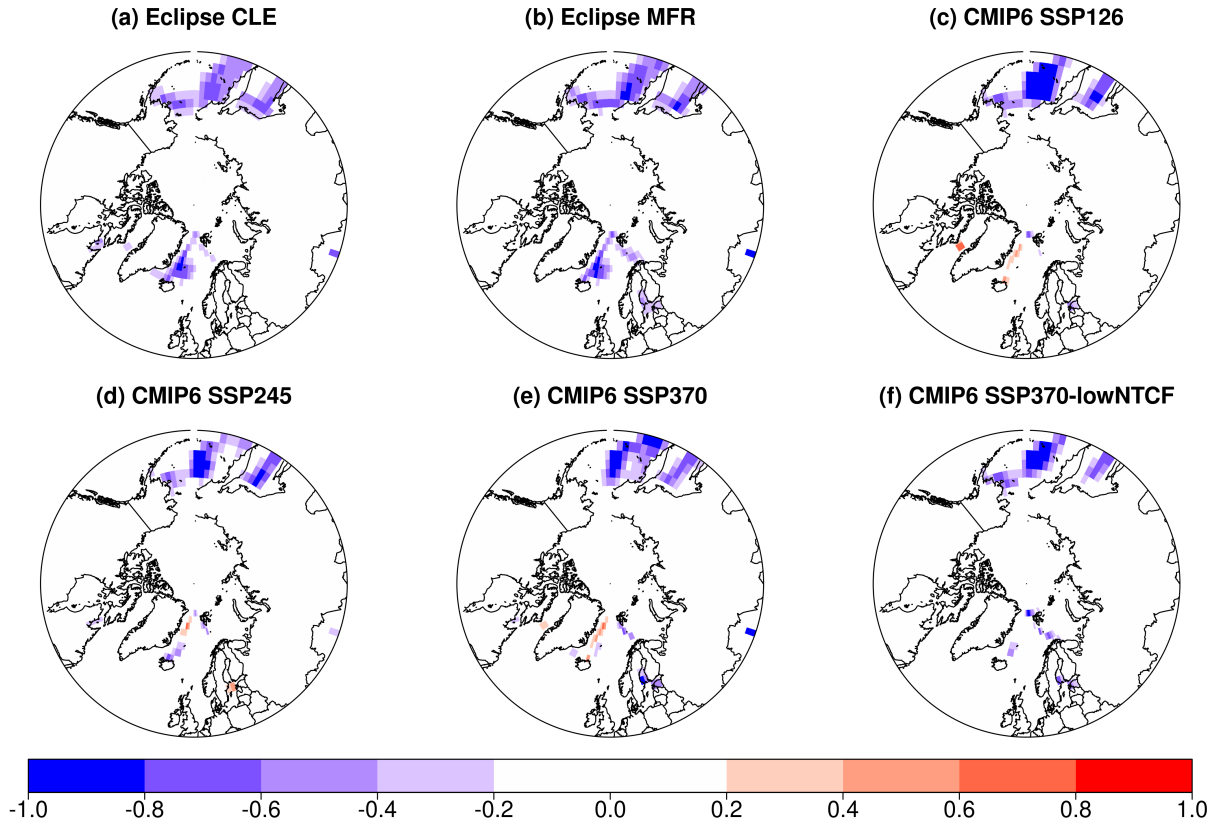

Figure S3. Spatial distribution of the March Arctic sea-ice fraction change between the 1990-2010 mean and the 2030-2050 mean as calculated by the GISS-E2.1 ensemble.

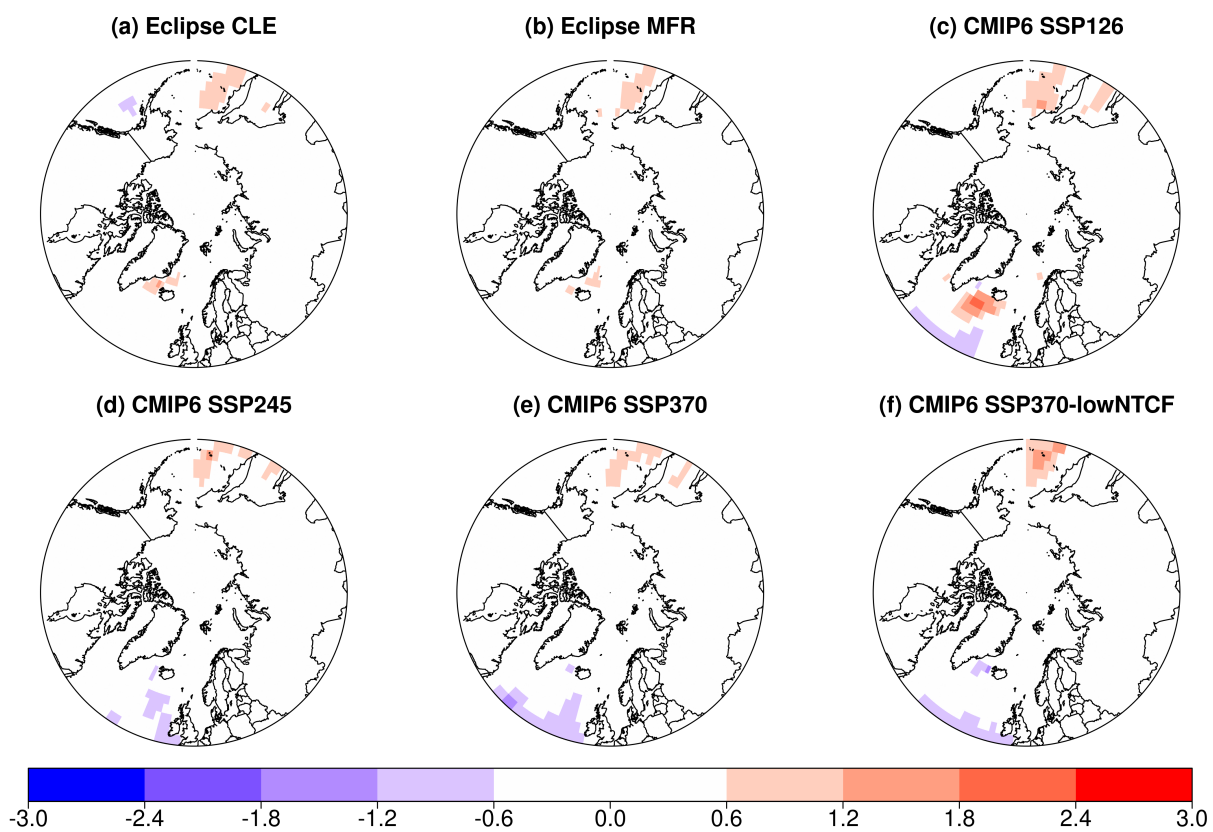

Figure S4. Spatial distribution of the March Arctic DMS emissions (Tg) change between the 1990-2010 mean and the 2030-2050 mean as calculated by the GISS-E2.1 ensemble.

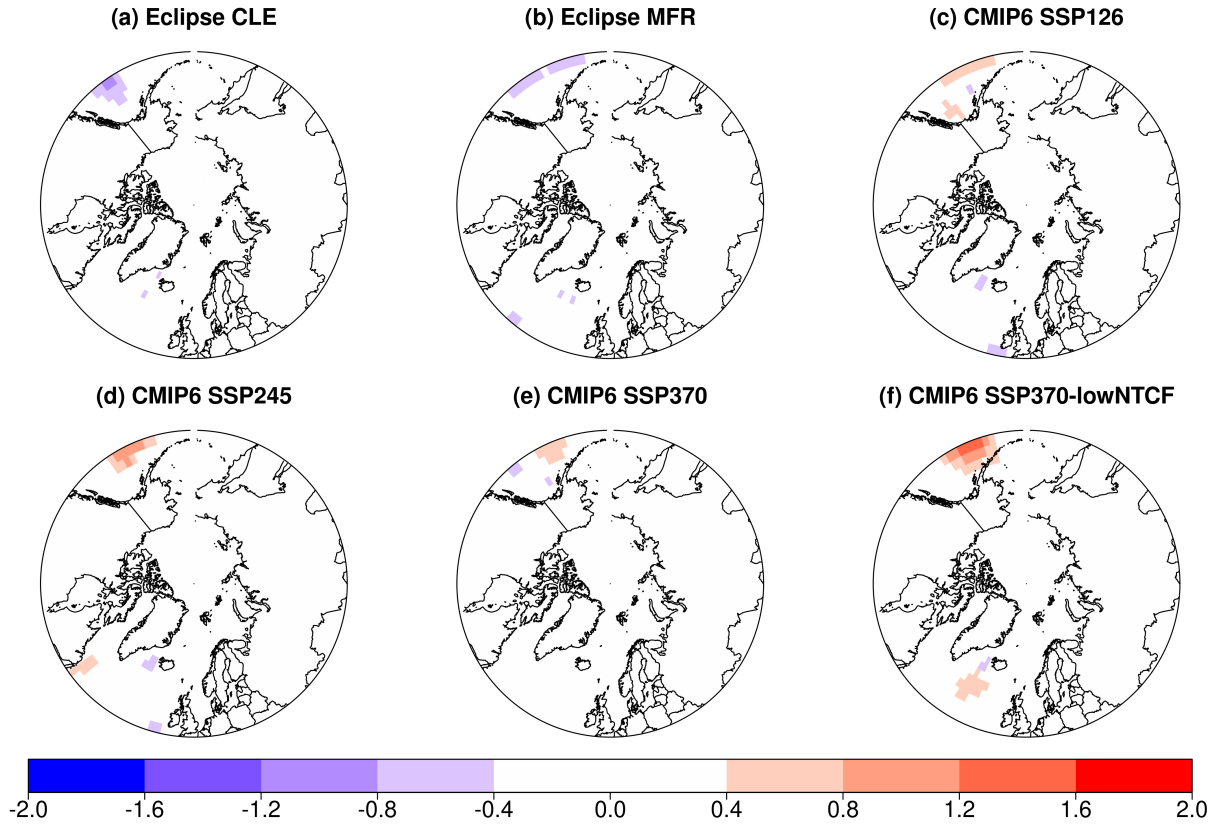

Figure S5. Spatial distribution of the September Arctic DMS emissions (Tg) change between the 1990-2010 mean and the 2030-2050 mean as calculated by the GISS-E2.1 ensemble.



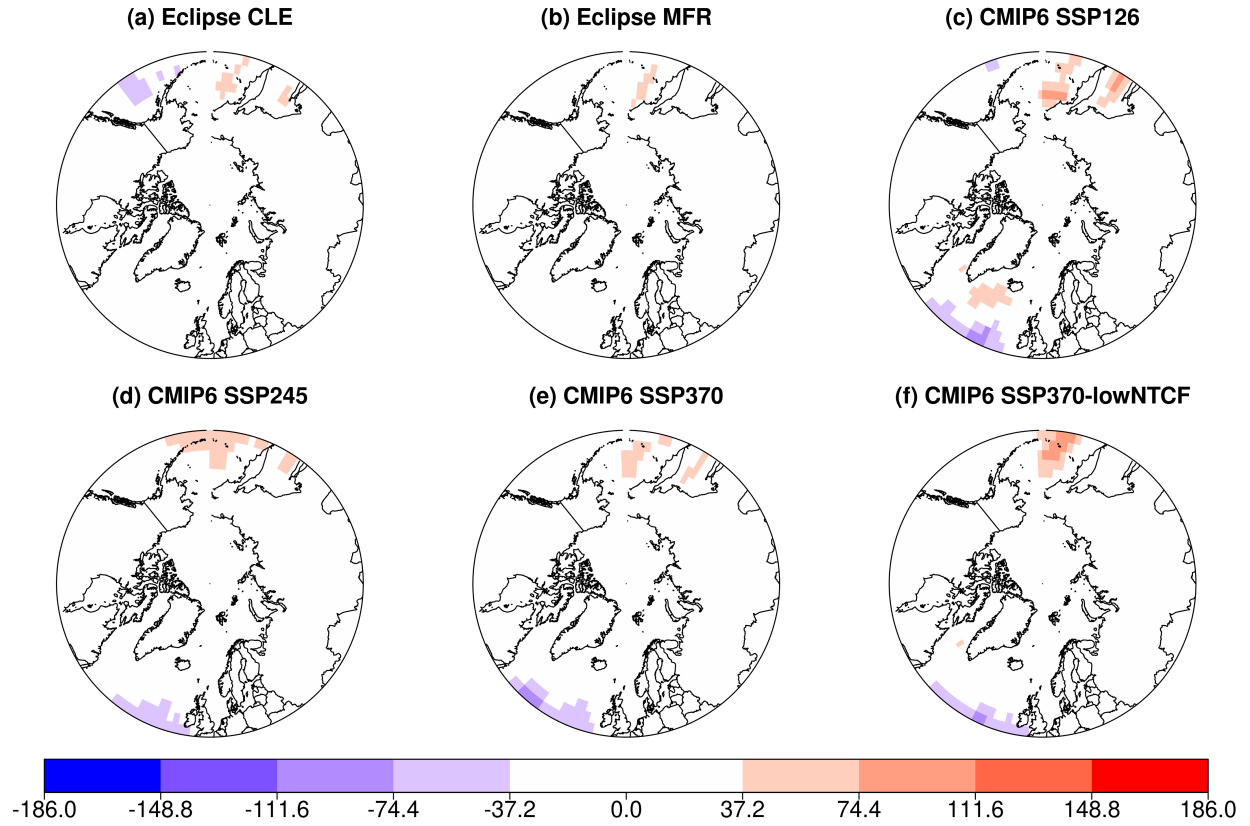

Figure S6. Spatial distribution of the March Arctic sea-salt emissions (Tg) change between the 1990-2010 mean and the 2030-2050 mean as calculated by the GISS-E2.1 ensemble.

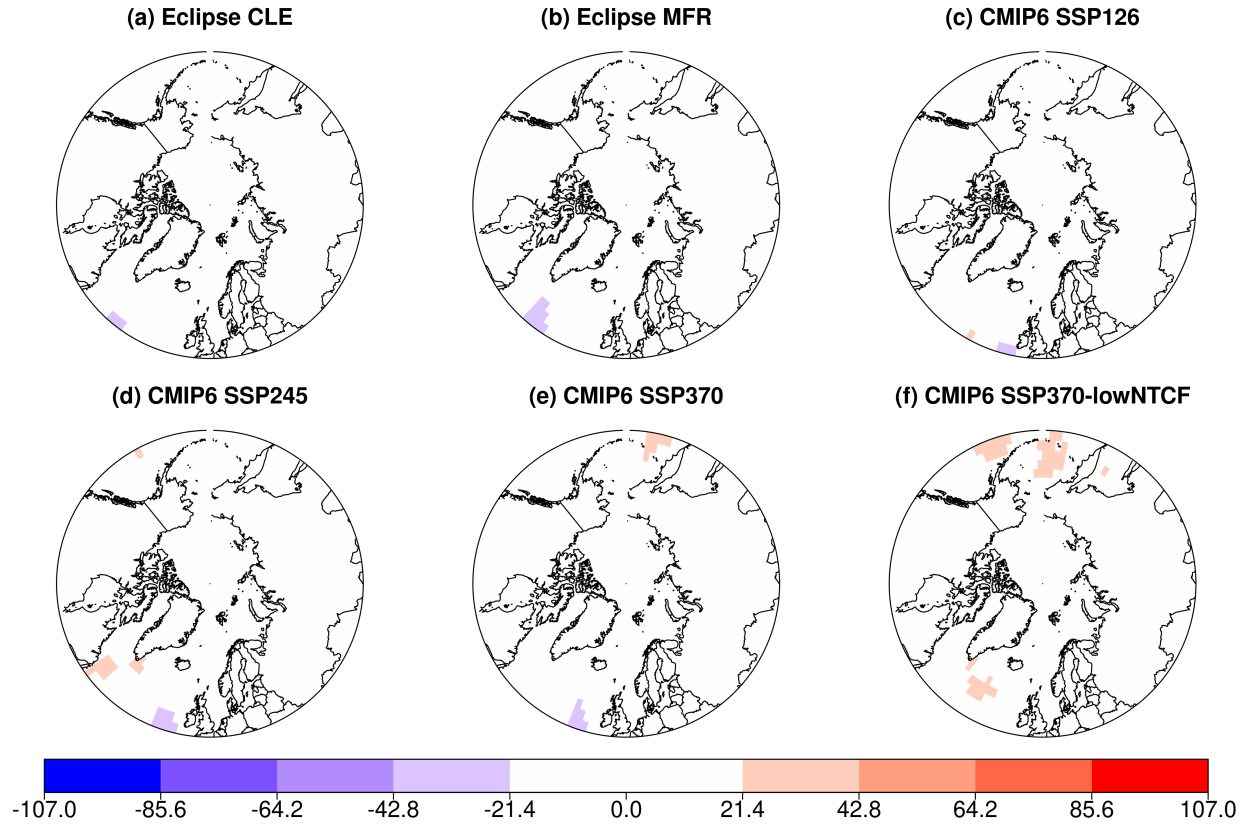

Figure S7. Spatial distribution of the September Arctic sea-salt emissions (Tg) change between the 1990-2010 mean and the 2030-2050 mean as calculated by the GISS-E2.1 ensemble.

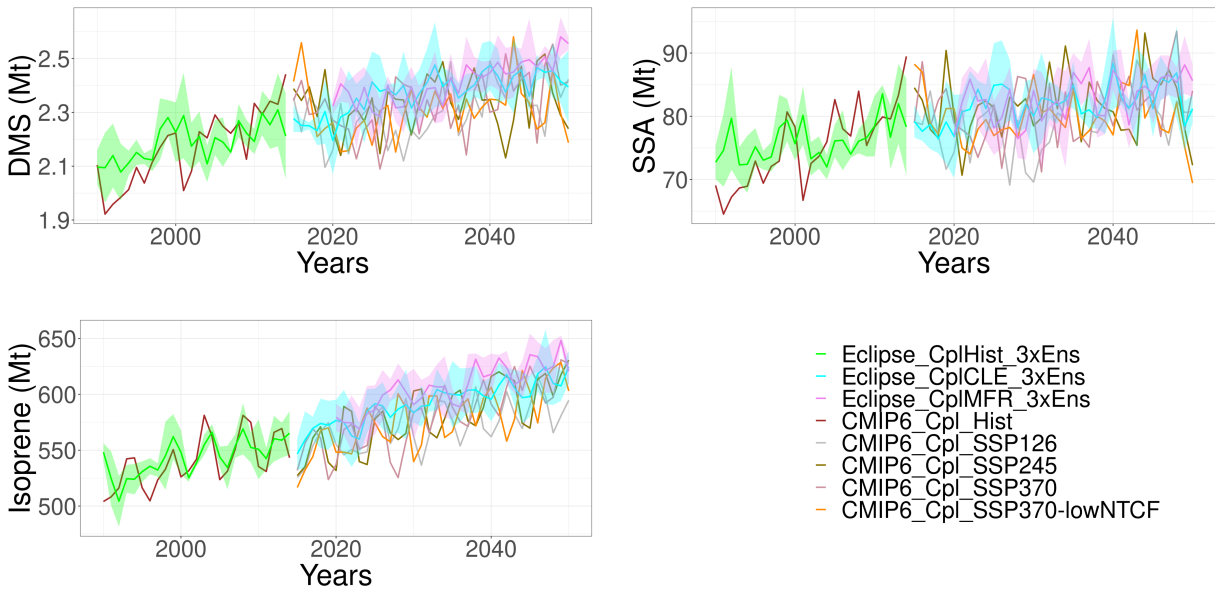

Figure S8. Arctic DMS and sea-salt and global isoprene emissions anomalies in 1900-2050 based on the 1990-2010 mean, simulated by the Eclipse and CMIP6 ensembles.

## References

- Bauguitte, S., *Facility for airborne atmospheric measurements: Science instruments*, Available at <http://www.faam.ac.uk/index.php/science-instruments/chemistry/64-instruments> , 2014.
- Biraud, S. C., *Carbon Monoxide Mixing Ratio System Handbook*, U.S. Dept. of Energy, ARM Clim. Res. Facil., Washington, D. C., 2011.
- Bottenheim, J.W., J.D. Fuentes, D.W. Tarasick and K.G. Anlauf (2002), *Ozone in the Arctic lower troposphere during winter and spring 2000 (ALERT2000)*, *Atmospheric Environment*, 36, 2535-2544.
- Chow, J. C., Watson, J. G., Pritchett, L. C., Pierson, W. R., Frazier, C. a. and Purcell, R. G.: *The dri thermal/optical reflectance carbon analysis system: description, evaluation and applications in U.S. Air quality studies*, *Atmos. Environ. Part A. Gen. Top.*, 27(8), 11851201, doi:10.1016/0960-1686(93)90245-T, 1993
- Betty Croft, R. V. Martin, W. Richard Leaitch, J Burkart, R.Y.-W. Chang, D. B. Collins, P. L. Hayes, A. L. Hodshire<sup>6</sup>, L. Huang, J. K. Kodros, A. Moravek<sup>4</sup>, E. L. Mungall, J. G. Murphy, S. Sharma, S. Tremblay, G. R. Wentworth, M. D. Willis, J. P. D. Abbatt, and J. R. Pierce, *Arctic marine secondary organic aerosol contributes significantly to summertime particle size distributions in the Canadian Arctic Archipelago*, *Atmos. Chem. Phys.*, 19, 2787–2812, 2019, <https://doi.org/10.5194/acp-19-2787-2019>.
- Dabek-Zlotorzynska, E., Dann, T. F., Martinelango, P. K., Celio, V. Brook, J. R., Mathieu, D., Ding, L., Austin, C. C., *Canadian National Air Pollution Surveillance (NAPS) PM<sub>2.5</sub> speciation program: Methodology and PM<sub>2.5</sub> chemical composition for the years 2003–2008*, *Atmospheric Environment*, 45, 3, 2011, 673-686, <https://doi.org/10.1016/j.atmosenv.2010.10.024>.
- EMEP manual, <https://projects.nilu.no/ccc/manual/> , 2014.
- Galbally, I.E., Schultz, M.G., Buchmann, B., Gilge, S., Guenther, F., Koide, H., Oltmans, S., Patrick, L., Scheel, H.-E., Smit, H., Steinbacher, M., Steinbrecht, W., Tarasova, O., Viallon, J., Volz-Thomas, A., Weber, M., Wielgosz R. and Zellweger C. *Guidelines for Continuous Measurement of Ozone in the Troposphere*, GAW Report No 209, Publication WMO-No. 1110, ISBN 978-92-63-11110-4, World Meteorological Organisation, Geneva Switzerland, 76 pp., 2013. <http://www.wmo.int/pages/prog/arep/gaw/gaw-reports.html>
- Harris, D.: *Quantitative Chemical Analysis, 6th ed.*, edited by M. L. Byrd, Michelle Russel Julet,

New York., 2003.

Kondo, Y., L. Sahu, N. Moteki, F. Khan, N. Takegawa, X. Liu, M. Koike, T. Miyakawa (2011), *Consistency and traceability of black carbon measurements made by laser-induced incandescence, thermal-optical transmittance, and filter-based photo-absorption techniques*, *Aerosol Sci. Tech.*, 45, 295-312, DOI: 10.1080/02786826.2010.533215.

Leaitch, W. R., Sharma, S., Huang, L., Toom-Saunty, D., Chivulescu, A., Macdonald, A.A., von Salzen, K., *Dimethyl Sulfide Control of the Clean Summertime Arctic Aerosol and Cloud*, *Elementa Science of the Anthropocene* 1: 000017, 2013, doi:10.12952/journal.elementa.000017dlementascience.org

Malm, W. C., Sisler, J. F., Huffman, D., Eldred, R. A., and Cahill, T. A.: *Spatial and seasonal trends in particle concentration and optical extinction in the United States*, *J. Geophys. Res.*, 99, 1347–1370, 1994.

Nattinger, Kristian C. *Temporal and Spatial Trends of Fine Particulate Matter Composition in Fairbanks, Alaska*, PhD thesis, University of Alaska, Fairbanks, 2016.

Sharma, S., W. R. Leaitch, L. Huang, Daniel Veber, Felicia Kolonjari, Wendy Zhang, Sarah J. Hanna, Allan K. Bertram, and John A. Ogren, *An evaluation of three methods for measuring black carbon in Alert, Canada*, *Atmos. Chem. Phys.*, 17, 15225–15243, 2017, <https://doi.org/10.5194/acp-17-15225-2017>.

Sharma, S., Barrie, L.A., Magnusson, E., Brattstrom, G., Leaitch, W. R., Steffen, A., and Landsberger, S., *A factor and trends analysis of multidecadal lower tropospheric observations of arctic aerosol composition, black carbon, ozone, and mercury at Alert, Canada*. *J. Geophys. Res.: Atmospheres*, 124, 14, 133-14, 161, 2019, <http://doi.org/10.1029/2019JD030844>.

Skov, H. Christensen, J. Goodsite, M.E. Heidam, N.Z. Jensen, B. Wählin, P. and Geernaert, G.: *The fate of elemental mercury in Arctic during atmospheric mercury depletion episodes and the load of atmospheric mercury to Arctic*. *ES & T*, 38, 2373-2382, 2004.

Tørseth, K., Aas, W., Breivik, K., Fjæraa, A. M., Fiebig, M., Hjellbrekke, A. G., Lund Myhre, C., Solberg, S., and Yttri, K. E.: *Introduction to the European Monitoring and Evaluation Programme (EMEP) and observed atmospheric composition change during 1972–2009*, *Atmos. Chem. Phys.*, 12, 5447–5481, doi:10.5194/acp-12-5447-2012, 2012.
